# Supplementary material
Source: publisher figshare collection journal article supplement (https://tandf.figshare.com/articles/dataset/_/25026078)
Supplement: Supplementary file 1 [file 1]

**Supplementary Table 1. The primary and secondary antibodies used in this study**

| <b>Materials</b>                        | <b>Source</b>          | <b>Identifier</b> |
|-----------------------------------------|------------------------|-------------------|
| Anti- $\alpha$ -SMA                     | Proteintech            | 14395-1           |
| Anti-TGF- $\beta$ 1                     | Proteintech            | 21898-1           |
| Anti-E-cadherin                         | Proteintech            | 20874-1           |
| Anti-GAPDH                              | Proteintech            | 60004-1           |
| IRDye® 800CW Goat<br>anti-Mouse IgG     | LI-COR Biosciences     | 925-32210         |
| IRDye® 680RD Goat<br>anti-Rabbit IgG    | LI-COR Biosciences     | 925-68071         |
| HRP-labeled Goat<br>Anti-Rabbit IgG(H+L | Beyotime Biotechnology | A0208             |
